# Supplementary material for: Synthesis and reactivity of the novel hydride derivative RhHCl(TIMP3) (HTIMP3 = tris[1-(diphenylphosphino)-3-methyl-1H-indol-2-yl]methane)
Source: Royal Society of Chemistry journal article supplement (doi:10.1039/b816185b), 2009-01-01

# Synthesis of the novel hydride derivative $\text{RhHCl}(\text{TIMP}_3)$ ( $\text{HTIMP}_3 =$ tris[1-(diphenylphosphino)-3-methyl-1*H*-indol-2-yl]methane) and investigation of its reactivity

Marco Ciclosi, Francisco Estevan, Pascual Lahuerta,\* Vincenzo Passarelli,\* Julia Pérez-Prieto,\* Mercedes Sanaú.

*Electronic Supplementary Information:*  $^{31}\text{P}\{^1\text{H}\}$  NMR spectra and selected regions of  $^1\text{H}$ - $^{13}\text{C}$  HSQC NMR spectra of compounds **1H**, **2H<sup>+</sup>**-**5H<sup>+</sup>**, **6<sup>+</sup>**-**8<sup>+</sup>**.

$^{31}\text{P}\{^1\text{H}\}$  NMR spectra of **1H**, **2H<sup>+</sup>**-**5H<sup>+</sup>**, **6<sup>+</sup>**-**8<sup>+</sup>**.

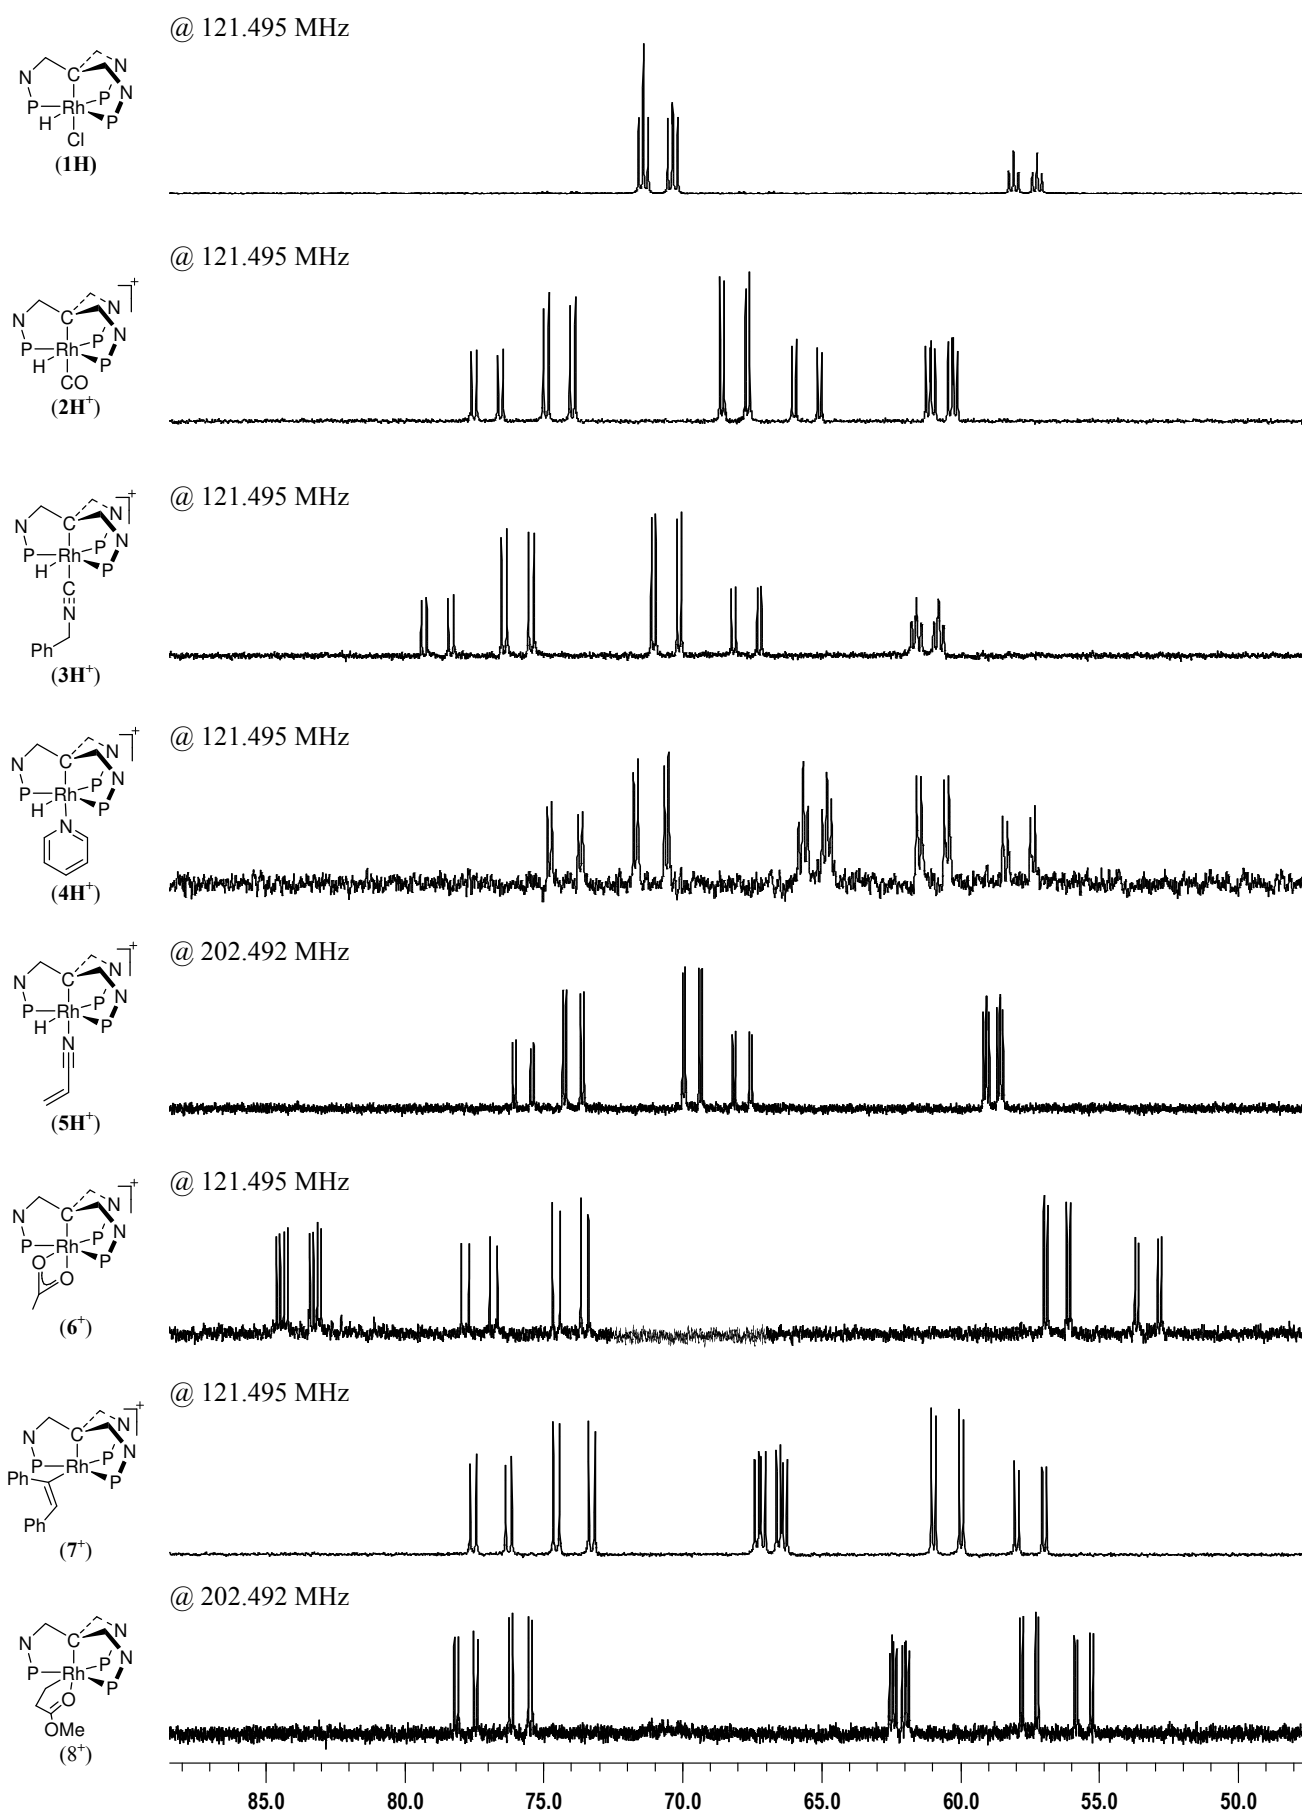

Selected region of the  $^1\text{H}$ - $^{13}\text{C}$  HSQC NMR spectrum of **1H** showing the  $^1\text{H}$ - $^{13}\text{C}$  correlation peaks of the indolyl CH moieties.

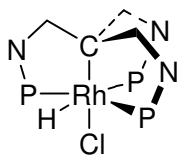

(**1H**)

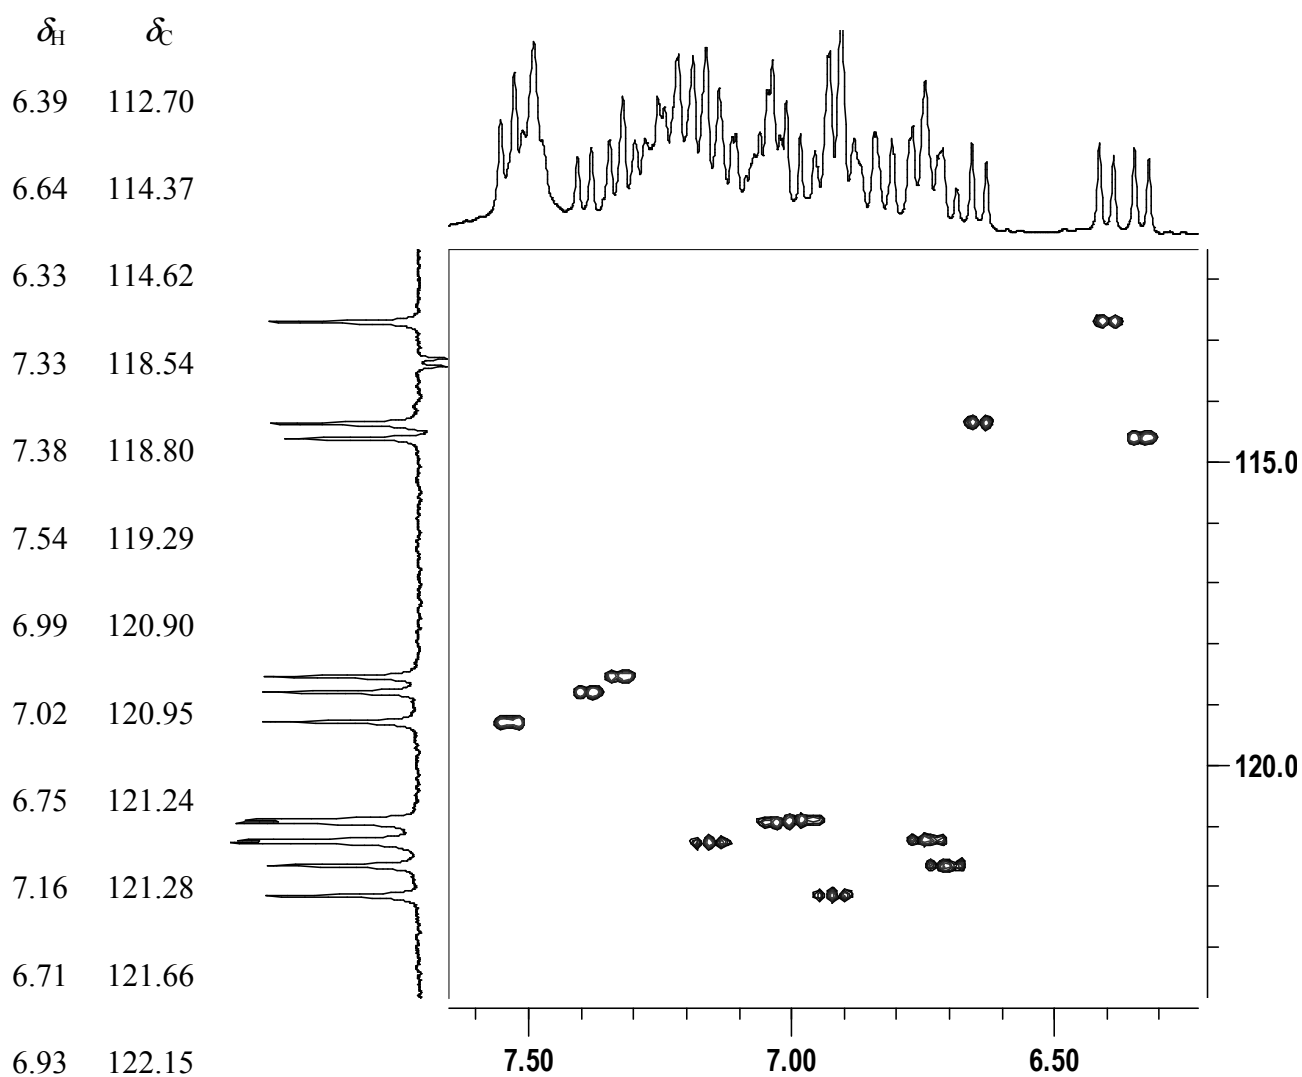

Selected region of the  $^1\text{H}$ - $^{13}\text{C}$  HSQC NMR spectrum of  $2\text{H}^+$  showing the  $^1\text{H}$ - $^{13}\text{C}$  correlation peaks of the indolyl CH moieties.

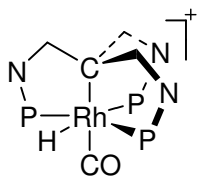

( $2\text{H}^+$ )

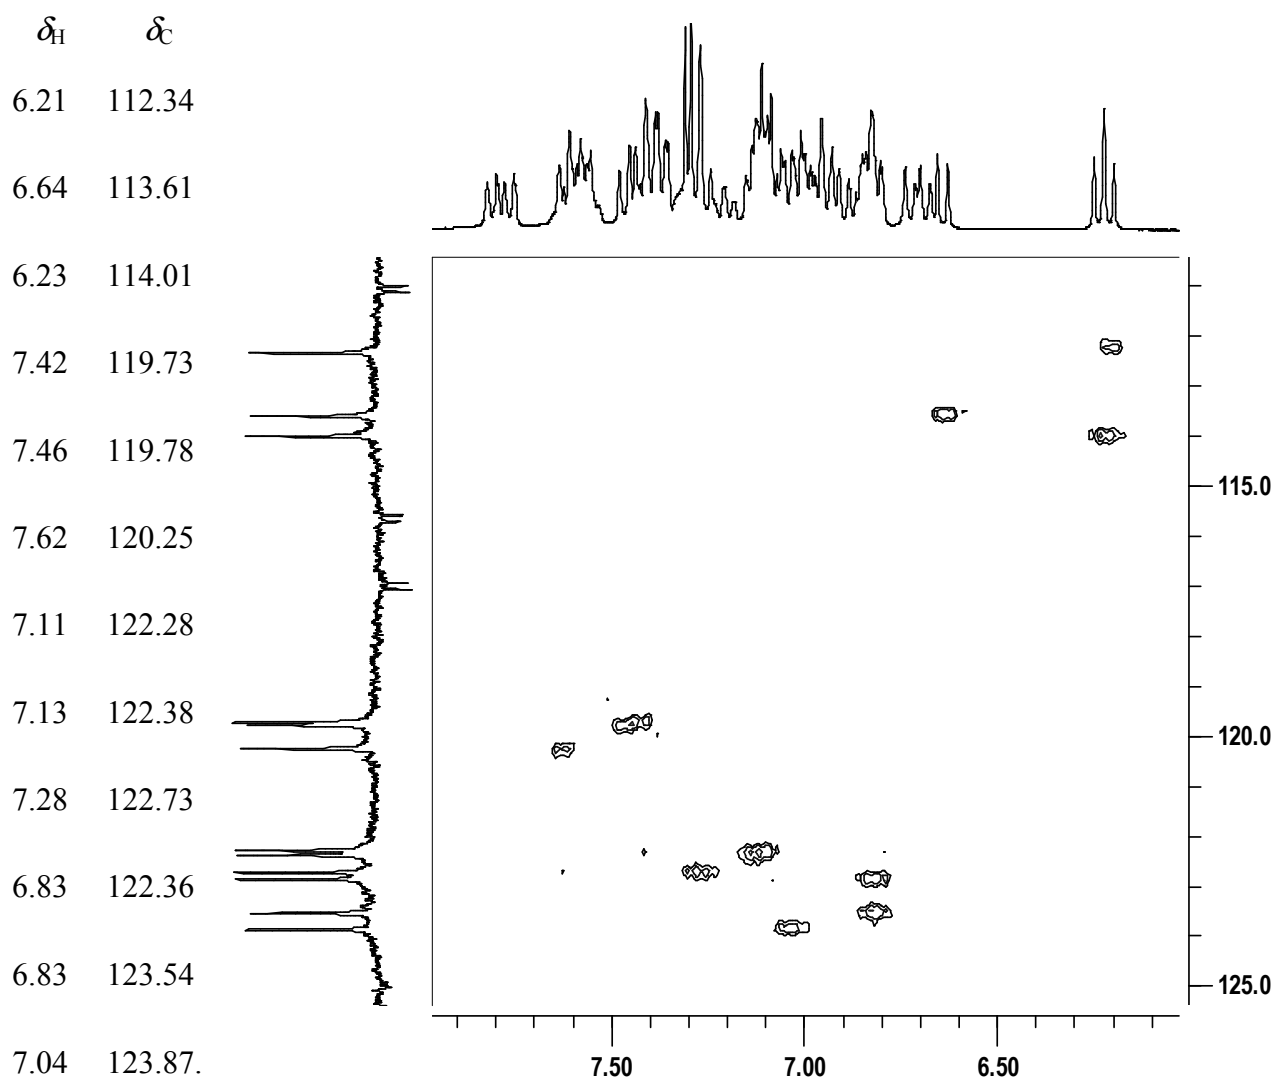

Selected region of the  $^1\text{H}$ - $^{13}\text{C}$  HSQC NMR spectrum of  $3\text{H}^+$   
 showing the  $^1\text{H}$ - $^{13}\text{C}$  correlation peaks of the indolyl CH moieties.

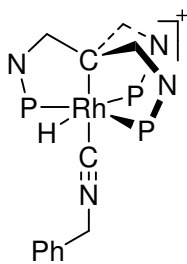

( $3\text{H}^+$ )

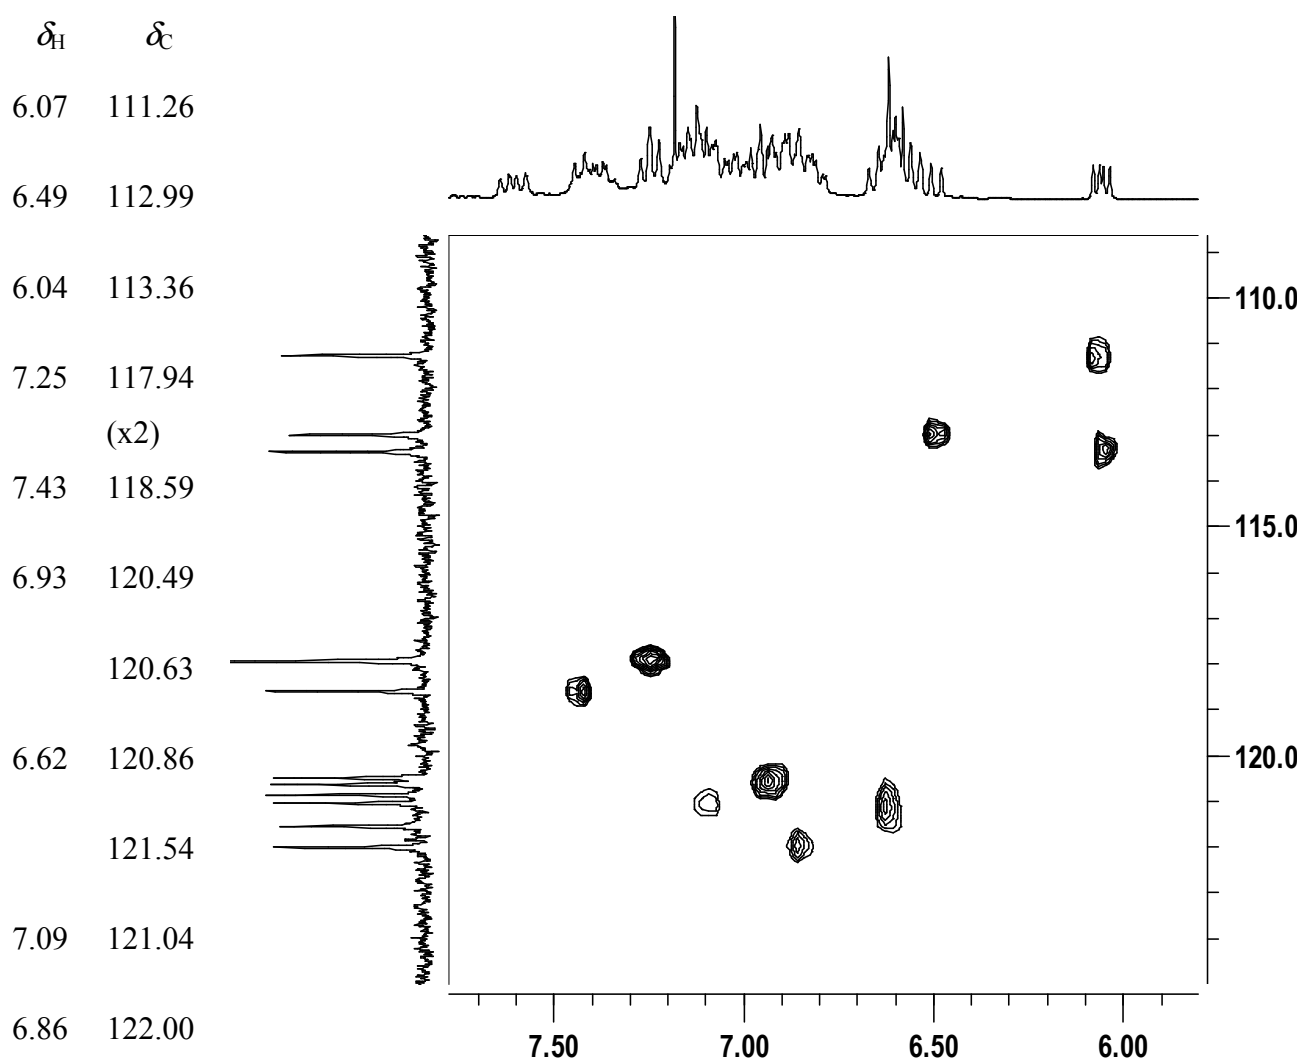

Selected region of the  $^1\text{H}$ - $^{13}\text{C}$  HSQC NMR spectrum of  $4\text{H}^+$  showing the  $^1\text{H}$ - $^{13}\text{C}$  correlation peaks of the indolyl CH moieties.

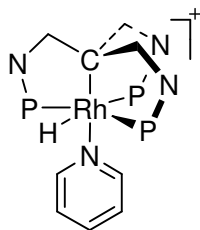

( $4\text{H}^+$ )

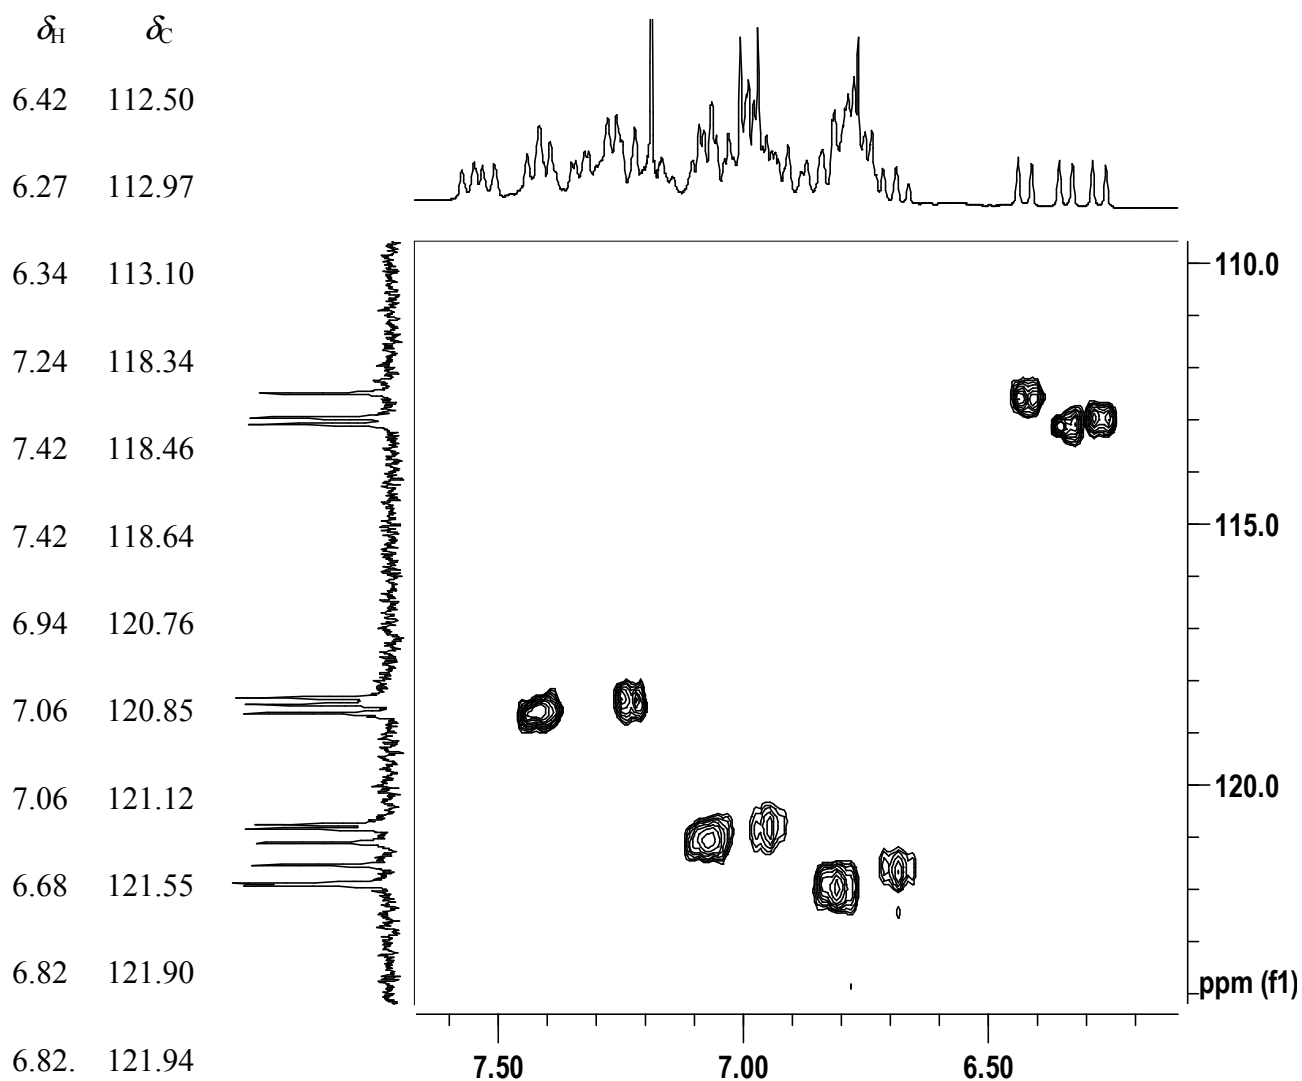

Selected region of the  $^1\text{H}$ - $^{13}\text{C}$  HSQC NMR spectrum of  $5\text{H}^+$  showing the  $^1\text{H}$ - $^{13}\text{C}$  correlation peaks of the indolyl CH moieties.

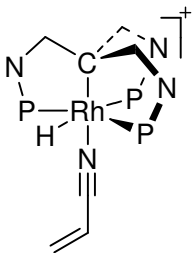

( $5\text{H}^+$ )

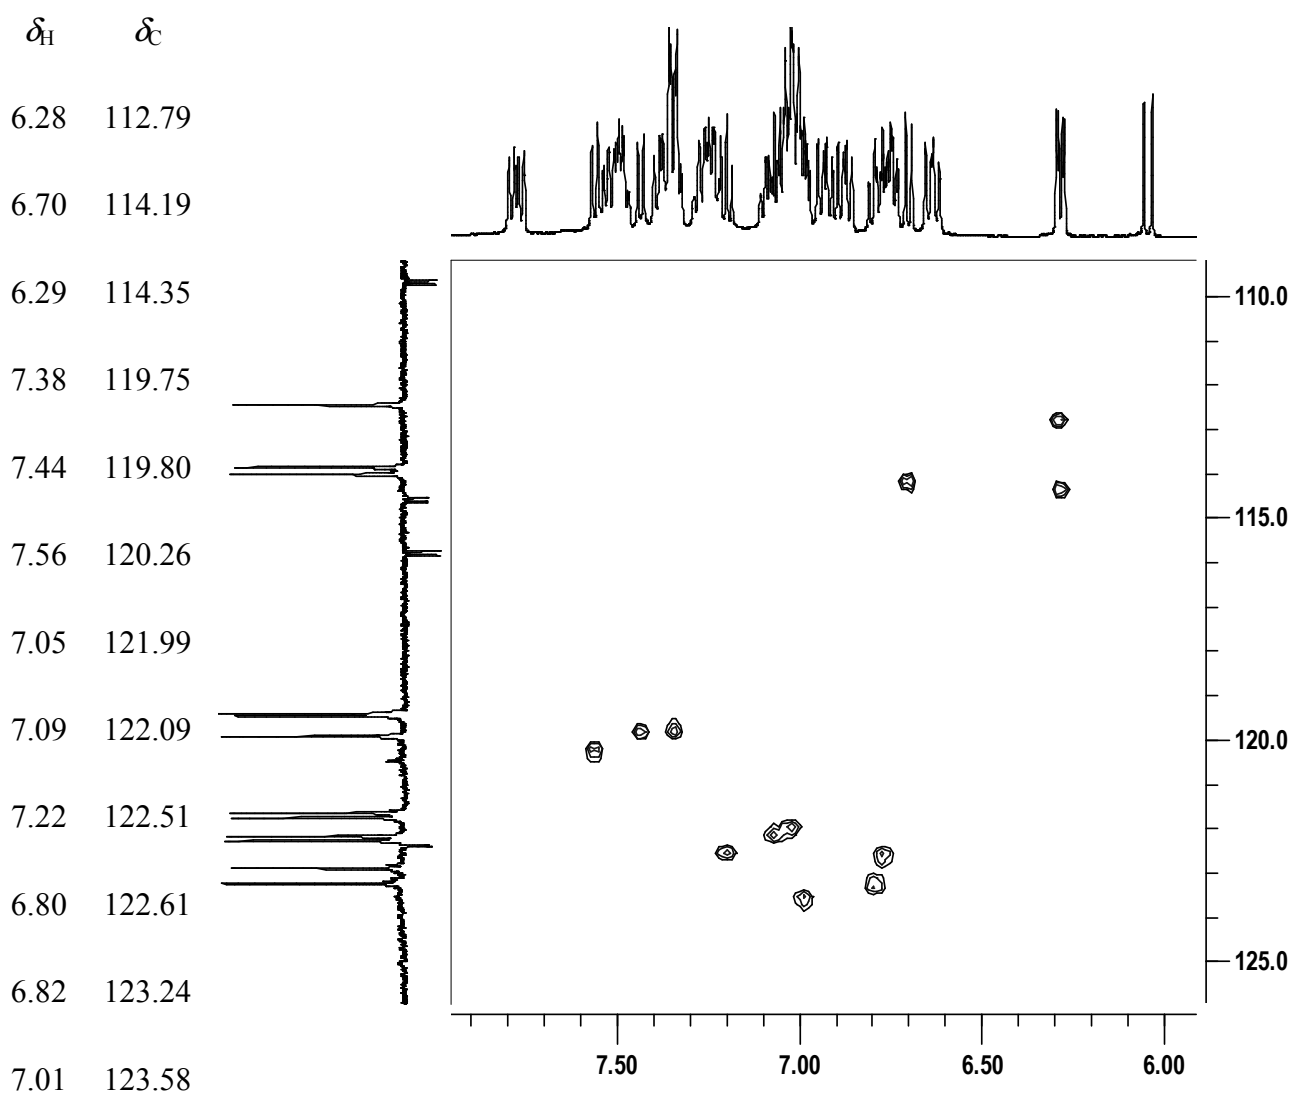

Selected region of the  $^1\text{H}$ - $^{13}\text{C}$  HSQC NMR spectrum of  $6^+$  showing the  $^1\text{H}$ - $^{13}\text{C}$  correlation peaks of the indolyl CH moieties.

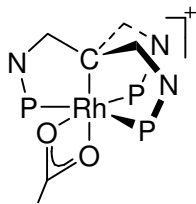

( $6^+$ )

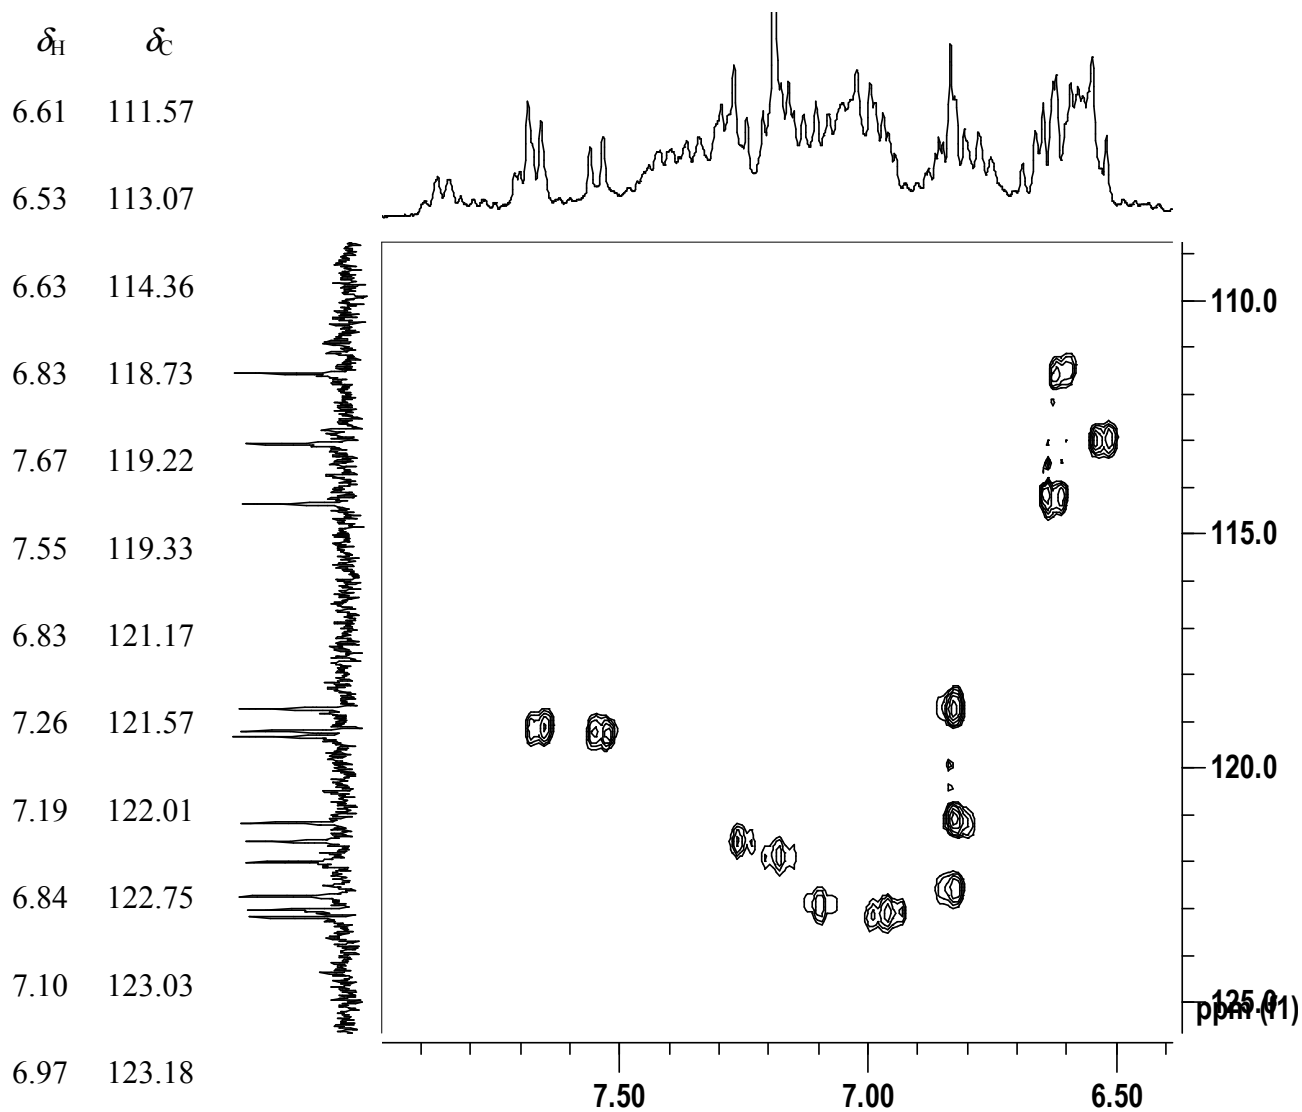



Selected region of the  $^1\text{H}$ - $^{13}\text{C}$  HSQC NMR spectrum of  $7^+$  showing the  $^1\text{H}$ - $^{13}\text{C}$  correlation peaks of the indolyl CH moieties.

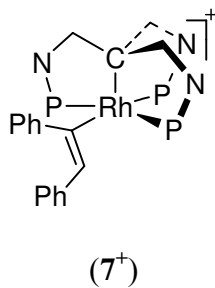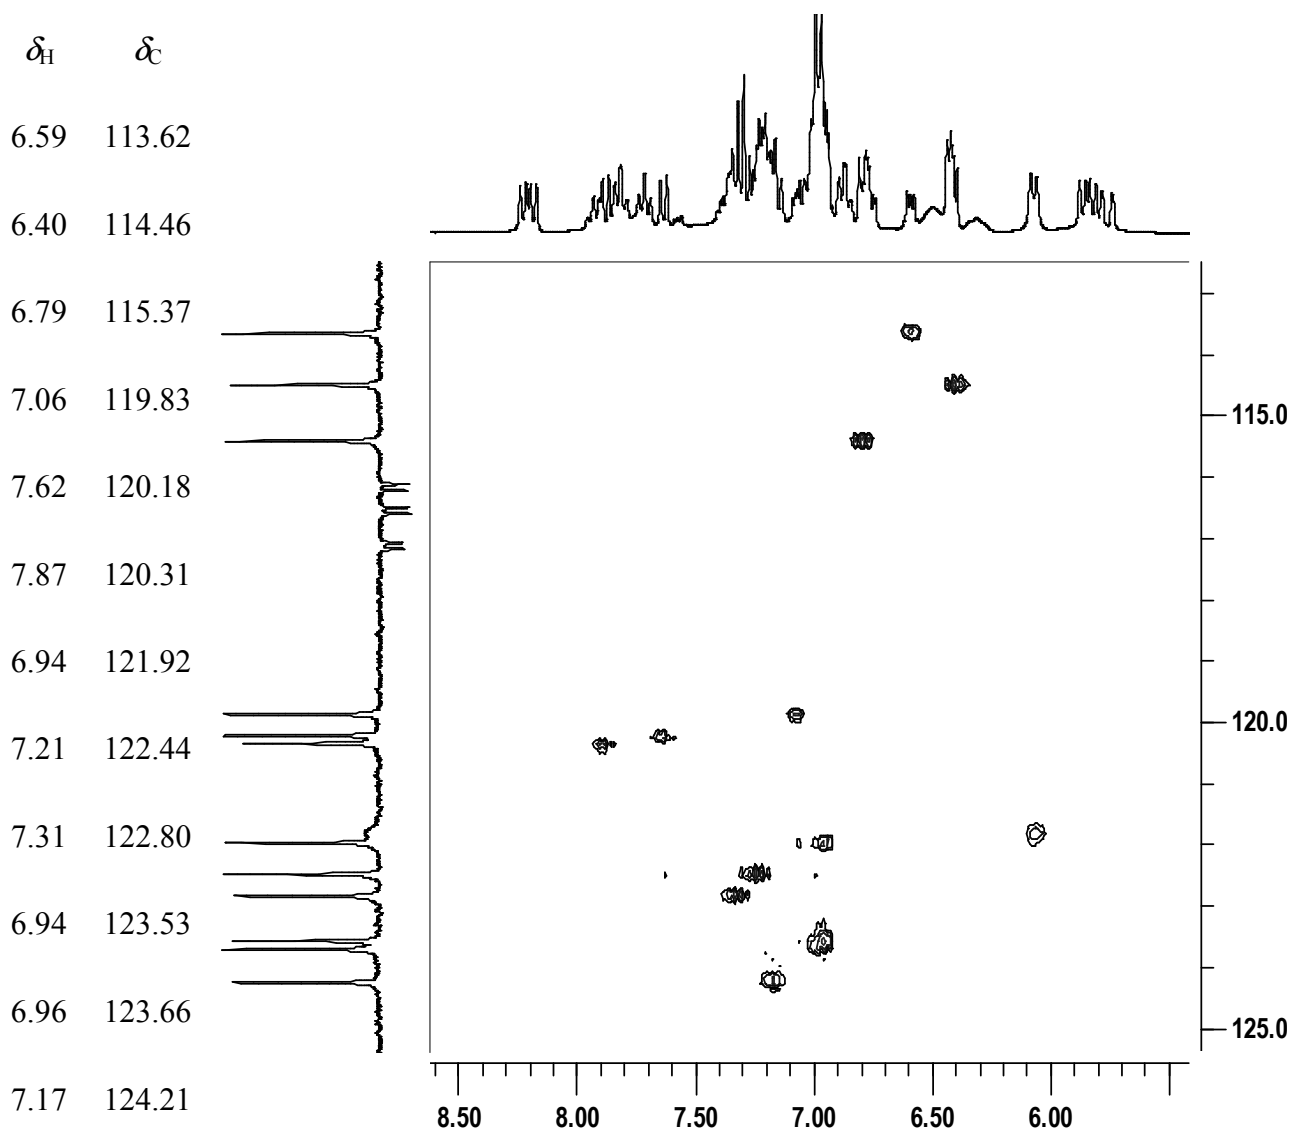

Selected region of the  $^1\text{H}$ - $^{13}\text{C}$  HSQC NMR spectrum of  $8^+$  showing the  $^1\text{H}$ - $^{13}\text{C}$  correlation peaks of the indolyl CH moieties.

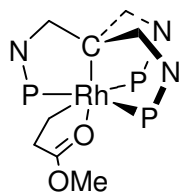

( $8^+$ )

| $\delta_{\text{H}}$ | $\delta_{\text{C}}$ |
|---------------------|---------------------|
| 6.21                | 114.16              |
| 6.91                | 114.72              |
| 6.87                | 115.61              |
| 7.34                | 119.34              |
| 7.63                | 119.92              |
| 7.68                | 120.24              |
| 7.04                | 121.84              |
| 6.79                | 122.43              |
| 7.31                | 122.43              |
| 7.30                | 122.67              |
| 7.16                | 123.02              |
| 7.10                | 123.15              |

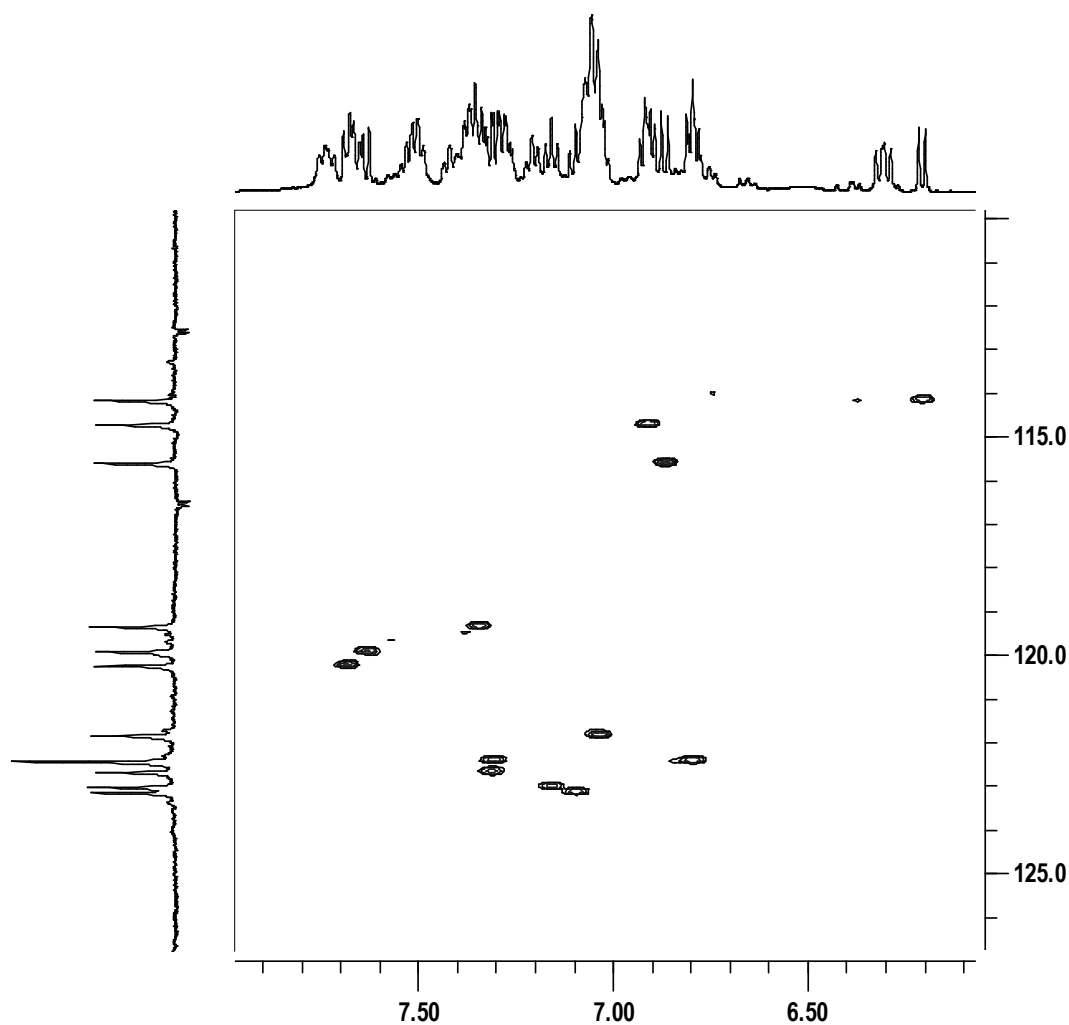

Supplement: b816185b.pdf [file b816185b.pdf]
